# Supplementary material
Source: PubMed Central journal article supplement (PMC6816094)
Supplement: supp_RA119.010027_154056_2_supp_387851_pxdqqn.pdf [file supp_RA119.010027_154056_2_supp_387851_pxdqqn.pdf]

## Supporting Information

For Foote et al., “Phosphorylation of the HCN channel auxiliary subunit TRIP8b is altered in an animal model of temporal lobe epilepsy and modulates channel function”

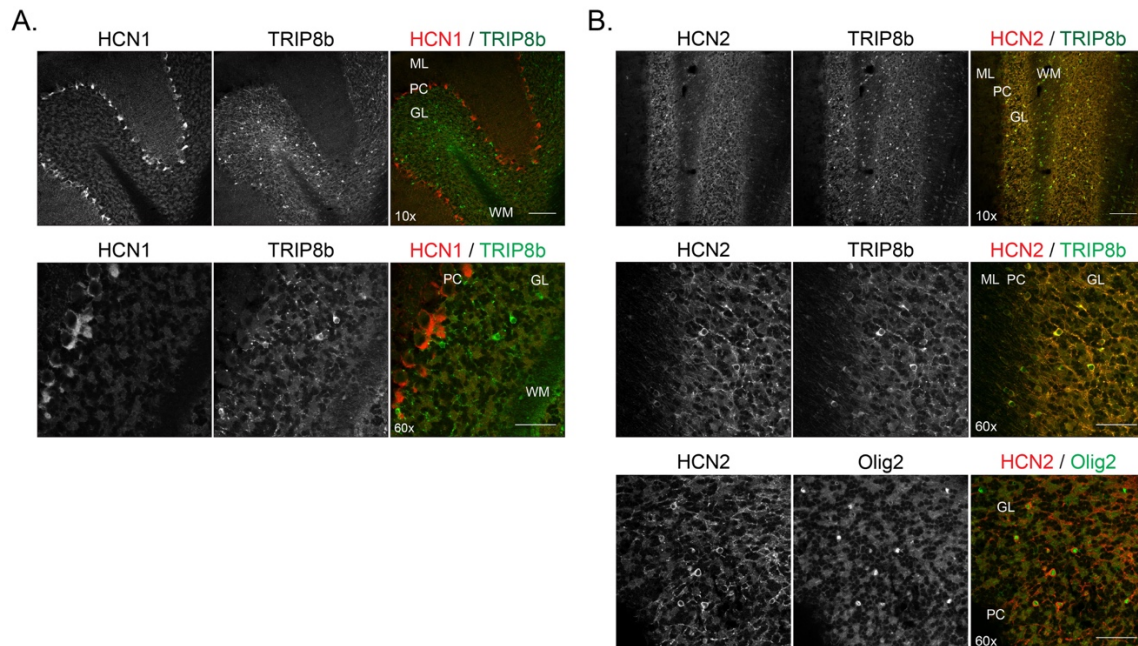

**Figure S1.** Co-localization of TRIP8b and HCN2 but not HCN1 in the cerebellum.

A) Cerebellum stained with antibodies against HCN1 and TRIP8b at 10x or 60x magnification (n=4). B) Cerebellum stained with antibodies against HCN2, TRIP8b, and Olig2 at 10x or 60x magnification (n=4). PC= Purkinje cells, ML= molecular layer, GL= granular layer, WM= white matter. Scale bar= 100 $\mu$ m for 10x images and 50 $\mu$ m for 60x images.

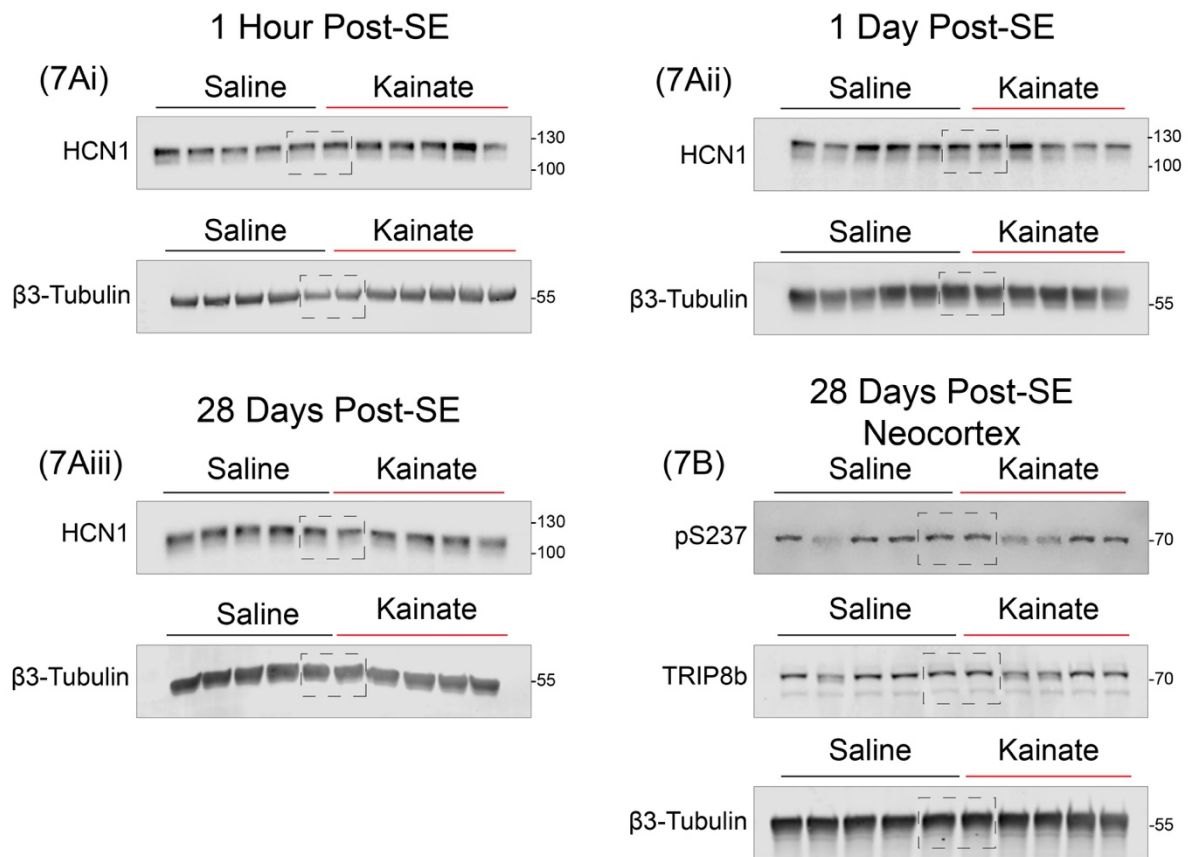

**Figure S2.** Immunoblots from saline- or KA-treated rats. Immunoblots correspond to Figure 7. A) Hippocampi were harvested from saline- or kainate (KA)-treated rats at (i) 1 hour, (ii) 1 day, or (iii) 28 days post-SE. Immunoblots were probed with antibodies against HCN1 and  $\beta$ 3-Tubulin. B) The neocortex was harvested from saline- or KA-treated rats at 28 days post-SE. Immunoblots were probed with antibodies against pS237, TRIP8b, and  $\beta$ 3-Tubulin.

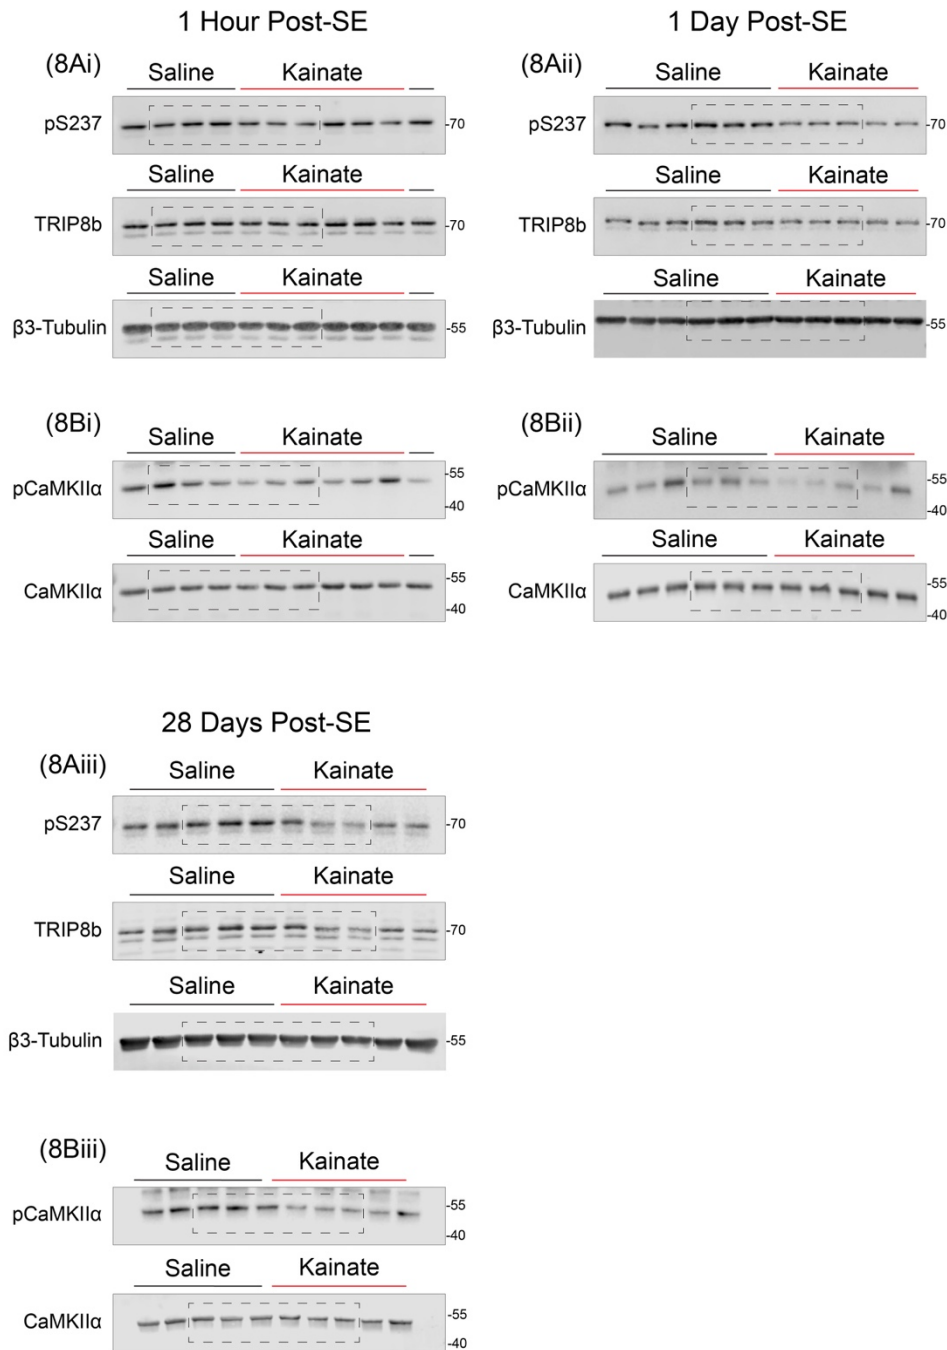

**Figure S3.** Immunoblots from saline- or KA-treated rats. Immunoblots correspond to Figure 8. Hippocampi were harvested from saline- or kainate (KA)-treated rats at (i) 1 hour, (ii) 1 day, or (iii) 28 days post-SE. Immunoblots were probed with antibodies against pS237, TRIP8b, and β3-Tubulin (A) or pCaMKIIα and CaMKIIα (B).

| HCN1 Expression in the Hippocampus |                            |                                       |                                   |         |
|------------------------------------|----------------------------|---------------------------------------|-----------------------------------|---------|
| Time Point (Post-SE)               | Normalization Scheme       | Normalized Density (Saline) $\pm$ SEM | Normalized Density (KA) $\pm$ SEM | P-Value |
| 1 Hour                             | HCN1/<br>$\beta$ 3-Tubulin | 1.0 $\pm$ 0.1<br>N=5                  | 1.1 $\pm$ 0.1<br>N=6              | p=0.7   |
| 1 Day                              | HCN1/<br>$\beta$ 3-Tubulin | 1.0 $\pm$ 0.1<br>N=6                  | 0.9 $\pm$ 0.2<br>N=5              | p=0.6   |
| 28 Days                            | HCN1/<br>$\beta$ 3-Tubulin | 1.00 $\pm$ 0.04<br>N=5                | 1.1 $\pm$ 0.1<br>N=5              | p=0.4   |

**Table S1.** Total HCN1 protein expression is unchanged in the hippocampus at 1 hour, 1 day, and 28 days post-SE.

Hippocampi from saline- or kainic acid (KA)-treated rats were harvested at 1 hour, 1 day, or 28 days post-status epilepticus (SE). HCN1 was normalized to  $\beta$ 3-Tubulin, and immunoblot band density was quantified using an unpaired Student's t-test,  $p > 0.05$ . Data is presented as mean  $\pm$  standard error of the mean (SEM).

| pS237 Expression in the Neocortex |                      |                                       |                                   |         |
|-----------------------------------|----------------------|---------------------------------------|-----------------------------------|---------|
| Time Point (Post-SE)              | Normalization Scheme | Normalized Density (Saline) $\pm$ SEM | Normalized Density (KA) $\pm$ SEM | P-Value |
| 28 Days                           | pS237/<br>TRIP8b     | 1.0 $\pm$ 0.1<br>N=5                  | 0.9 $\pm$ 0.1<br>N=5              | p=0.3   |

**Table S2.** pS237 is unchanged in the neocortex at 28 days post-SE.

The neocortex from saline- or kainic acid (KA)-treated rats was harvested at 28 days post-status epilepticus (SE). pS237 was normalized to TRIP8b, and immunoblot band density was quantified using an unpaired Student's t-test,  $p > 0.05$ . Data is presented as mean  $\pm$  standard error of the mean (SEM).

A.

| Protein Expression at 1 Hour Post-SE |                                       |                                   |         |
|--------------------------------------|---------------------------------------|-----------------------------------|---------|
| Normalization Scheme                 | Normalized Density (Saline) $\pm$ SEM | Normalized Density (KA) $\pm$ SEM | P-Value |
| pS237/ TRIP8b                        | 1.00 $\pm$ 0.04<br>N=5                | 0.81 $\pm$ 0.04<br>N=6            | p=0.008 |
| pCaMKII $\alpha$ / CaMKII $\alpha$   | 1.0 $\pm$ 0.2<br>N=5                  | 0.9 $\pm$ 0.1<br>N=6              | p=0.8   |

B.

| Protein Expression at 1 Day Post-SE |                                       |                                   |          |
|-------------------------------------|---------------------------------------|-----------------------------------|----------|
| Normalization Scheme                | Normalized Density (Saline) $\pm$ SEM | Normalized Density (KA) $\pm$ SEM | P-Value  |
| pS237/ TRIP8b                       | 1.0 $\pm$ 0.1<br>N=6                  | 0.7 $\pm$ 0.1<br>N=5              | p=0.0098 |
| pCaMKII $\alpha$ / CaMKII $\alpha$  | 1.0 $\pm$ 0.1<br>N=6                  | 0.5 $\pm$ 0.2<br>N=5              | p=0.048  |

C.

| Protein Expression at 28 Days Post-SE |                                       |                                   |         |
|---------------------------------------|---------------------------------------|-----------------------------------|---------|
| Normalization Scheme                  | Normalized Density (Saline) $\pm$ SEM | Normalized Density (KA) $\pm$ SEM | P-Value |
| pS237/ TRIP8b                         | 1.0 $\pm$ 0.1<br>N=10                 | 0.7 $\pm$ 0.1<br>N=11             | p=0.001 |
| pCaMKII $\alpha$ / CaMKII $\alpha$    | 1.0 $\pm$ 0.1<br>N=5                  | 0.63 $\pm$ 0.04<br>N=5            | p=0.005 |

**Table S3.** Changes in TRIP8b phosphorylation and CaMKII $\alpha$  activity in the KA model of TLE. Hippocampi from saline- or kainic acid (KA)-treated rats were harvested at 1 hour (A), 1 day (B), or 28 days (C) post-status epilepticus (SE). pS237 was normalized to total TRIP8b and pCaMKII $\alpha$  was normalized to total CaMKII $\alpha$ . Immunoblot band density was quantified using an unpaired Student's t-test,  $p > 0.05$ . Data is presented as mean  $\pm$  standard error of the mean (SEM).
